# Supplementary material for: The Impact of the COVID-19 Pandemic on Antibiotic Prescribing Trends in Outpatient Care: A Nationwide, Quasi-Experimental Approach
Source: MDPI journal article supplement (doi:10.3390/antibiotics10091040), 2021-08-25
Supplement: s1 [file s1]

## Supplementary Materials

### The impact of the COVID-19 pandemic on antibiotic prescribing trends in outpatient care: a nationwide, quasi-experimental approach

**Table S1.** Monthly comparison analysis of the prescription of several antibiotic groups and clarithromycin as defined daily dose per 1000 inhabitants per day (DID) in outpatient care, before and after COVID-19 emergence.

|                                                    |           | 2018  | 2019  | Mean 2018<br>and 2019 | 2020 | Change in<br>Percentage |
|----------------------------------------------------|-----------|-------|-------|-----------------------|------|-------------------------|
| 3rd generation Cephalosporins prescribing<br>(DID) | JANUARY   | 0.11  | 0.10  | 0.10                  | 0.11 | 5.4                     |
|                                                    | FEBRUARY  | 0.11  | 0.10  | 0.10                  | 0.10 | -2.8                    |
|                                                    | MARCH     | 0.090 | 0.085 | 0.09                  | 0.07 | -19.9                   |
|                                                    | APRIL     | 0.085 | 0.080 | 0.08                  | 0.06 | -31.6                   |
|                                                    | MAY       | 0.078 | 0.082 | 0.08                  | 0.06 | -25.9                   |
|                                                    | JUNE      | 0.082 | 0.076 | 0.08                  | 0.07 | -16.6                   |
|                                                    | JULY      | 0.076 | 0.079 | 0.08                  | 0.08 | -0.5                    |
|                                                    | AUGUST    | 0.077 | 0.073 | 0.08                  | 0.08 | 2.1                     |
|                                                    | SEPTEMBER | 0.078 | 0.078 | 0.08                  | 0.07 | -3.6                    |
|                                                    | OCTOBER   | 0.080 | 0.088 | 0.08                  | 0.08 | -8.9                    |
|                                                    | NOVEMBER  | 0.076 | 0.088 | 0.08                  | 0.07 | -9.7                    |
|                                                    | DECEMBER  | 0.079 | 0.10  | 0.09                  | 0.07 | -21.1                   |
| Fluoroquinolone prescribing (DID)                  | JANUARY   | 1.3   | 1.2   | 1.3                   | 1.1  | -15.8                   |
|                                                    | FEBRUARY  | 1.3   | 1.2   | 1.2                   | 0.90 | -27.8                   |
|                                                    | MARCH     | 1.2   | 1.1   | 1.2                   | 0.81 | -30.4                   |
|                                                    | APRIL     | 1.2   | 1.1   | 1.1                   | 0.55 | -51.4                   |
|                                                    | MAY       | 1.1   | 1.1   | 1.1                   | 0.59 | -46.9                   |
|                                                    | JUNE      | 1.1   | 0.96  | 1.0                   | 0.62 | -40.4                   |
|                                                    | JULY      | 1.2   | 1.0   | 1.1                   | 0.78 | -29.2                   |
|                                                    | AUGUST    | 1.0   | 0.92  | 0.98                  | 0.71 | -27.5                   |
|                                                    | SEPTEMBER | 1.1   | 0.98  | 1.0                   | 0.70 | -31.7                   |
|                                                    | OCTOBER   | 1.1   | 1.1   | 1.1                   | 0.67 | -39.9                   |
|                                                    | NOVEMBER  | 1.1   | 1.1   | 1.1                   | 0.65 | -39.5                   |
|                                                    | DECEMBER  | 0.98  | 0.95  | 0.96                  | 0.58 | -39.8                   |
| Clarithromycin prescribing<br>(DID)                | JANUARY   | 1.1   | 1.0   | 1.1                   | 0.87 | -19.2                   |
|                                                    | FEBRUARY  | 1.0   | 0.97  | 1.0                   | 0.78 | -22.5                   |
|                                                    | MARCH     | 0.85  | 0.75  | 0.80                  | 0.55 | -31.5                   |
|                                                    | APRIL     | 0.73  | 0.68  | 0.71                  | 0.21 | -70.4                   |
|                                                    | MAY       | 0.72  | 0.68  | 0.70                  | 0.20 | -71.9                   |
|                                                    | JUNE      | 0.68  | 0.58  | 0.63                  | 0.24 | -62.3                   |
|                                                    | JULY      | 0.61  | 0.59  | 0.60                  | 0.30 | -49.6                   |
|                                                    | AUGUST    | 0.56  | 0.51  | 0.54                  | 0.30 | -44.5                   |

|           |      |      |      |      |       |
|-----------|------|------|------|------|-------|
| SEPTEMBER | 0.57 | 0.57 | 0.57 | 0.34 | -40.5 |
| OCTOBER   | 0.66 | 0.67 | 0.66 | 0.35 | -46.5 |
| NOVEMBER  | 0.73 | 0.63 | 0.68 | 0.34 | -49.6 |
| DECEMBER  | 0.70 | 0.68 | 0.69 | 0.29 | -57.8 |

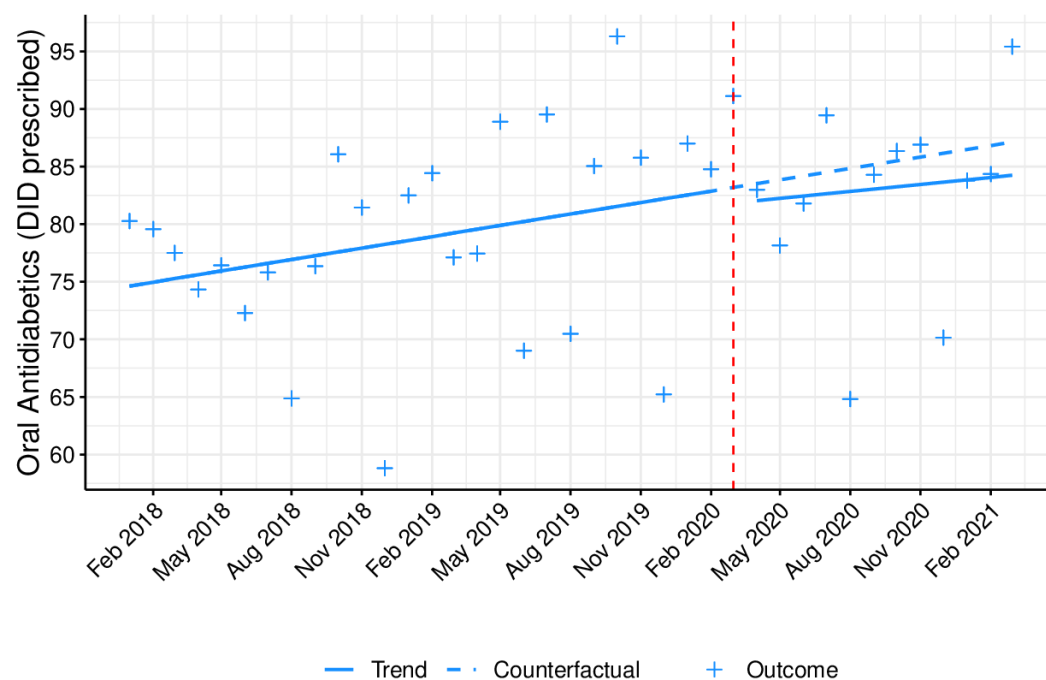

**Figure S1.** Monthly prescribing trend of oral antidiabetics as DID prescribed in outpatient care. Blue line (-): tendency line, after model adjustment; Blue dashed line: expected tendency line with no COVID-19 emergence; Red dashed line: Covid-19 emergence (March 2020); +: oral antidiabetic monthly prescription in DID.

**Table S2.** Interrupted segmented regression time series analysis of oral antidiabetics' prescribing as DID in outpatient care.

|                                     | Time: January 2018 to March 2021 |             | Immediate Effect |               | Long Term Effect |               |
|-------------------------------------|----------------------------------|-------------|------------------|---------------|------------------|---------------|
|                                     | B                                | 95%CI       | B                | 95%CI         | B                | 95%CI         |
| Oral Antidiabetic prescribing (DID) | 0.67 *                           | [0.16; 1.2] | 0.41             | [-11.4; 12.2] | -0.79            | [-2.2; -0.59] |

\*  $p < 0.05$ . DID: Defined Daily Dose per 1000 inhabitants per day; B: non-standardized coefficient; CI: Confidence Interval.
